# Supplementary material for: Impact of the position of the imine linker on the optoelectronic performance of π-conjugated organic frameworks
Source: Royal Society of Chemistry journal article supplement (doi:10.1039/c8me00079d), 2018-12-06
Supplement: c8me00079d1.pdf [file c8me00079d1.pdf]

## Supplementary Information for

### Impact of the Position of Imine-Linker over Optoelectronic Performance of $\pi$ -Conjugated Organic Frameworks

Samrat Ghosh,<sup>\*a</sup> Yusuke Tsutsui,<sup>a</sup> Katsuaki Suzuki,<sup>b</sup> Hironori Kaji,<sup>b</sup>  
Kayako Honjo,<sup>c</sup> Takashi Uemura,<sup>c</sup> Shu Seki<sup>\*a b</sup>

- a. Department of Molecular Engineering, Graduate School of Engineering, Kyoto University, Nishikyo-ku, Kyoto 615-8510, Japan. E-mail: [samratghosh8888@gmail.com](mailto:samratghosh8888@gmail.com), [seki@moleng.kyoto-u.ac.jp](mailto:seki@moleng.kyoto-u.ac.jp).
- b. Institute for Chemical Research, Kyoto University, Uji, Kyoto 611-0011, Japan.
- c. Department of Advanced Materials Science, Graduate School of Frontier Sciences, The University of Tokyo, 5-1-5 Kashiwanoha, Kashiwa, Chiba 277-8561, Japan.

#### 1. Scheme for the Synthesis of the Building blocks

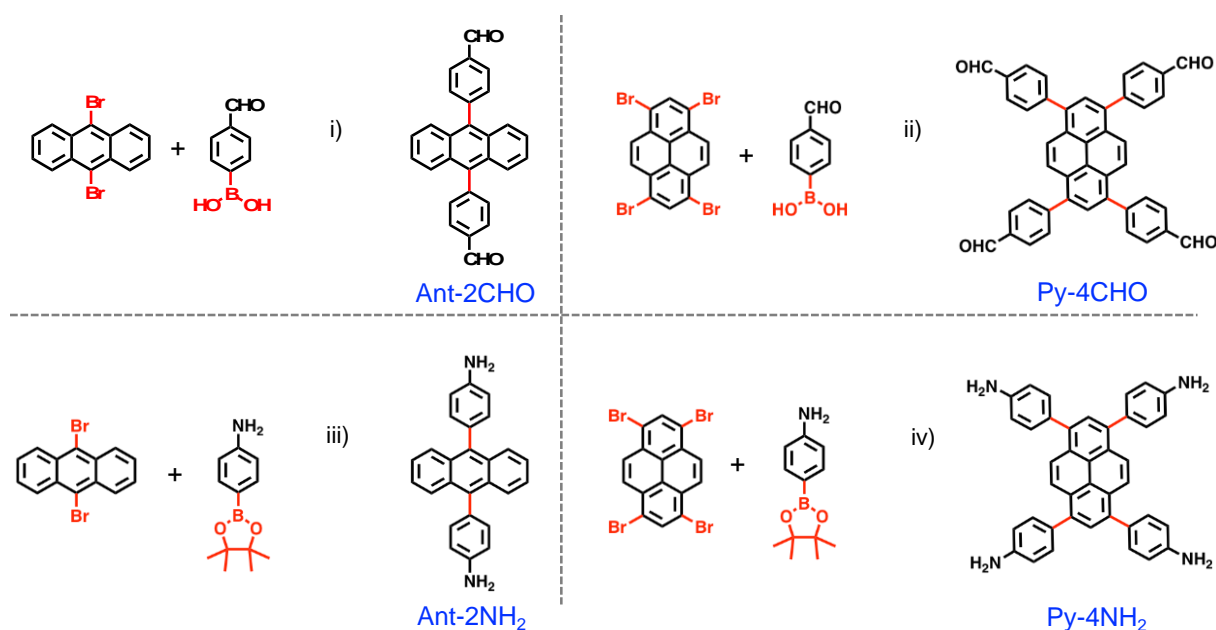

**Scheme 1.** Reagents and conditions: i) K<sub>2</sub>CO<sub>3</sub>, Pd(PPh<sub>3</sub>)<sub>4</sub>, Toluene:Ethanol:Water (5:1:2), reflux, 48 h; <sup>S1,S2</sup> ii) K<sub>2</sub>CO<sub>3</sub>, Pd(PPh<sub>3</sub>)<sub>4</sub>, Dioxane, reflux, 72 h; <sup>S3</sup> iii) Na<sub>2</sub>CO<sub>3</sub>, Pd(PPh<sub>3</sub>)<sub>4</sub>, Dioxane:Water (4:1), reflux, 48 h; iv) K<sub>2</sub>CO<sub>3</sub>, Pd(PPh<sub>3</sub>)<sub>4</sub>, Dioxane:Water (4:1), reflux, 72 h. <sup>S4</sup>

**9,10-bis(4-formylphenyl)anthracene (Ant-2CHO).**

Yield = 84%, pale yellow powder.

$^1\text{H}$  NMR (400 MHz,  $\text{CDCl}_3$ ):  $\delta$  = 10.20 (2H, s, ArCHO), 8.14 (4H, d, ArH), 7.68 (4H, d, ArH), 7.62 (4H, d, ArH), 7.37 (4H, d, ArH).

$^{13}\text{C}$  NMR (100 MHz,  $\text{CDCl}_3$ ):  $\delta$  = 191.9 (ArCHO), 145.7, 136.2, 135.8, 132.1, 129.8, 129.4, 126.5, 125.7.

MALDI-TOF MS for  $\text{C}_{28}\text{H}_{18}\text{O}_2$ :  $[\text{M}]^+$  found 385.35, calculated 386.13.

**1,3,6,8-tetrakis(4-formylphenyl)pyrene (Py-4CHO).**

Yield = 70%, bright yellow powder.

$^1\text{H}$  NMR (400 MHz,  $\text{CDCl}_3$ ):  $\delta$  = 10.14 (2H, s, ArCHO), 8.16 (4H, d, ArH), 8.06 (8H, d, ArH), 8.02 (2H, s, ArH), 7.85 (8H, d, ArH).

$^{13}\text{C}$  NMR (100 MHz,  $\text{CDCl}_3$ ):  $\delta$  = 192.0 (ArCHO), 146.8, 136.5, 135.6, 131.4, 129.9, 128.5, 125.8.

MALDI-TOF MS for  $\text{C}_{44}\text{H}_{26}\text{O}_4$ :  $[\text{M}]^+$  found 618.08, calculated 618.18.

**9,10-bis(4-aminophenyl)anthracene (Ant-2NH<sub>2</sub>).**

Yield = 60%, bright greenish yellow powder.

$^1\text{H}$  NMR (400 MHz,  $\text{CDCl}_3$ ):  $\delta$  = 7.79 (4H, m, ArH), 7.30 (4H, m, ArH), 7.23 (4H, d, ArH), 6.91 (4H, d, ArH), 3.83 (4H, s, ArNH<sub>2</sub>).

$^{13}\text{C}$  NMR (100 MHz,  $\text{CDCl}_3$ ):  $\delta$  = 145.6, 137.0, 132.2, 130.4, 129.0, 127.1, 124.6, 115.0.

MALDI-TOF MS for  $\text{C}_{26}\text{H}_{22}\text{N}_2$ :  $[\text{M}]^+$  found 359.2, calculated 360.16.

**1,3,6,8-tetrakis(4-aminophenyl)pyrene (Py-4NH<sub>2</sub>).**

Yield = 75%, bright yellow powder.

$^1\text{H}$  NMR (400 MHz,  $d_8$ -THF):  $\delta$  = 9.95 (4H, s, ArH), 9.65 (2H, s, ArH), 9.16 (8H, d, ArH), 8.56 (8H, d, ArH), 6.25 (8H, s, ArNH<sub>2</sub>).

$^{13}\text{C}$  NMR (100 MHz,  $d_8$ -Acetone):  $\delta$  = 169.4, 152.2, 138.5, 138.1, 136.1, 132.0, 130.4, 128.7, 126.0.

MALDI-TOF MS for  $C_{40}H_{30}N_4$ :  $[M]^+$  found 566.02, calculated 566.25.

## 2. Syntheses of CMPs

### 2.1. Synthesis of C-AntPy

**Py-4NH<sub>2</sub>** (37 mg, 65.34  $\mu$ mol, 1 eq.) and **Ant-2CHO** (51 mg, 131.97  $\mu$ mol, 2 eq.) were dissolved in 8 mL dry dioxane by sonication. To this mixture, a solution of Scandium(III) trifluoromethanesulfonate (2.6 mg, 5.2  $\mu$ mol) was added, and the resulting suspension was gently sonicated to ensure proper mixing. This leads to an immediate formation of a colloidal suspension which was kept undisturbed for 6 hours for maximum conversion. An orange precipitate was obtained which was washed several times with dioxane, acetone, methanol (MeOH) and tetrahydrofuran (THF). Further, the precipitate was washed with THF using a Soxhlet extractor for 24 h to remove unreacted monomers as well trace amounts of metal catalyst. The precipitate was dried at 100 °C, yielding a bright yellow fluffy powder.

### 2.2. Synthesis of N-AntPY

**Ant-2NH<sub>2</sub>** (11.6 mg, 32.18  $\mu$ mol, 2 eq.) and **Py-4CHO** (10 mg, 16.17  $\mu$ mol, 1 eq.) were dissolved in 3 mL dry dioxane by sonication. To this mixture a solution of Scandium(III) trifluoromethanesulfonate (0.8 mg, 1.6  $\mu$ mol) was added, and the resulting suspension was gently sonicated to ensure proper mixing and kept it undisturbed for 8 hours. An yellow orange precipitate was obtained which was washed several times with dioxane, acetone, methanol (MeOH) and tetrahydrofuran (THF). Further, the precipitate was washed with THF using a Soxhlet extractor for 24 h to remove unreacted monomers as well trace amounts of metal catalyst. The precipitate was dried at 100 °C, yielding a dark yellow fluffy powder.

### 3. Description of Experimental Techniques

#### Flash–Photolysis Time Resolved Microwave Conductivity (FP–TRMC)

A resonant cavity was used to obtain a high degree of sensitivity in the conductivity measurements. The resonant frequency and microwave power were set at ~ 9.1 GHz and 3 mW, respectively, so that the electric field of the microwave was sufficiently small not to disturb the motion of charge carriers. The third harmonic generation (THG; 355nm) of a Nd:YAG laser (Continuum Inc., Surelite II, 5 –8 ns pulse duration, 10 Hz) was used as an excitation source. The laser power was fixed at  $2.5 \text{ mJ cm}^{-2} \text{ pulse}^{-1}$  for all excitation wavelengths (incident photon density,  $I_0 = 4.6 \times 10^{15} \text{ photons cm}^{-2} \text{ pulse}^{-1}$ ). An in–house–built Xe–flash lamp (10  $\mu\text{s}$  pulse duration, 10 Hz) with a power of  $0.3 \text{ mJ cm}^{-2} \text{ pulse}^{-1}$  was used for the Xe–flash TRMC experiments. For the attenuation of excitation light energy, neutral density filters were used for both Xe–flash and laser–flash TRMC. In the case of laser–flash TRMC, the photoconductivity transient  $\Delta\sigma$  is converted to the product of the quantum efficiency:  $\phi$  and the sum of charge carrier mobilities,  $\Sigma\mu$ , by  $\phi\Sigma\mu = \Delta\sigma (eI_0F_{\text{light}})^{-1}$ , where  $e$  and  $F_{\text{light}}$  are the unit charge of a single electron and a correction (or filling) factor.

#### 4. Additional Figures

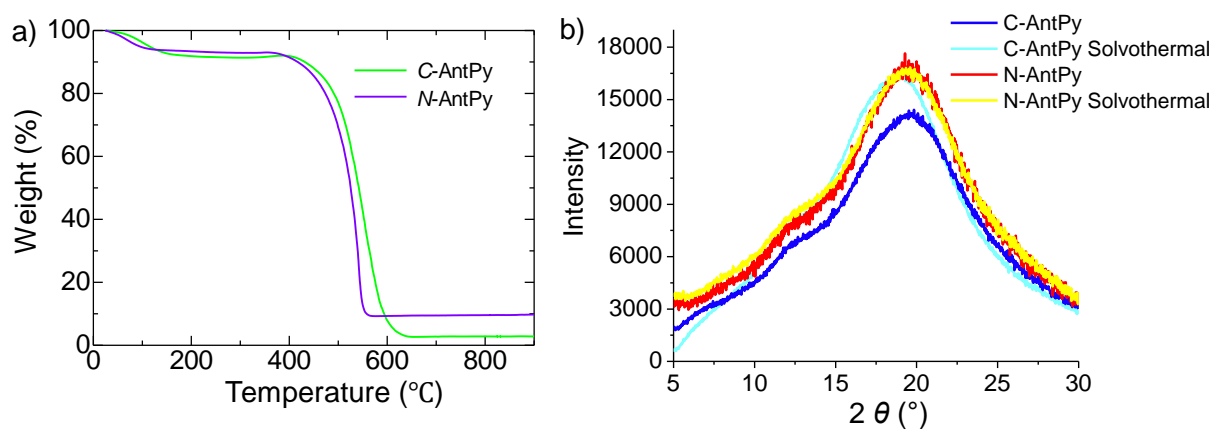

Fig. S1 (a) TGA and (b) PXRD of **C-AntPY** and **N-AntPY**.

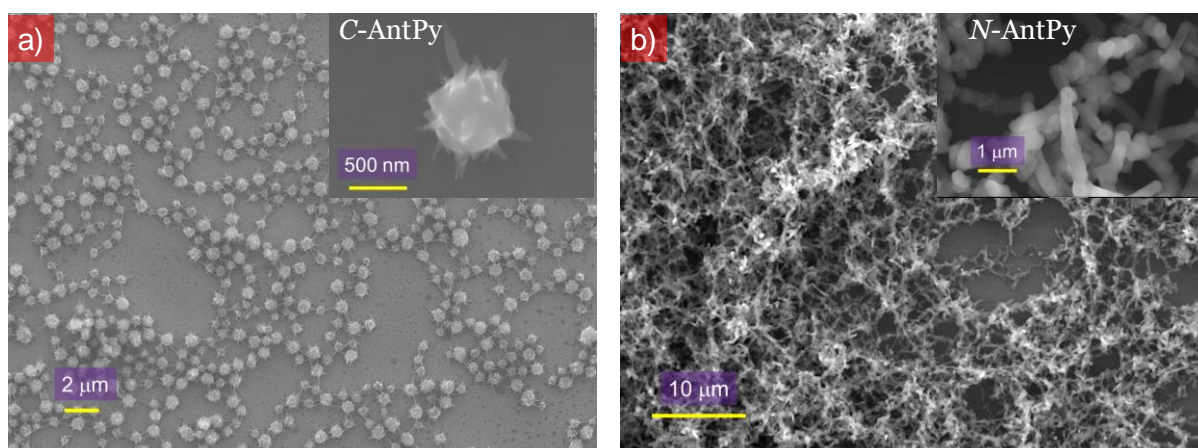

Fig. S2 SEM images of **C-AntPY** and **N-AntPY**.

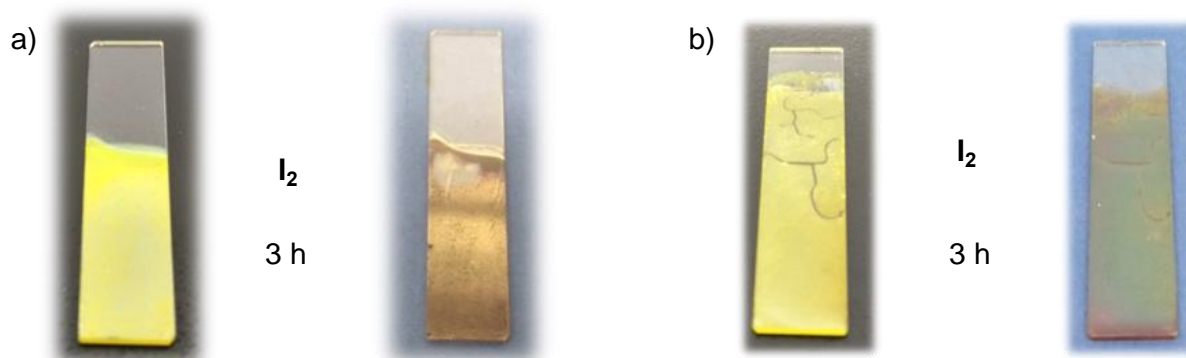

Fig. S3 Thin films of (a) **C-AntPY** and (b) **N-AntPY** before and after  $I_2$  doping.

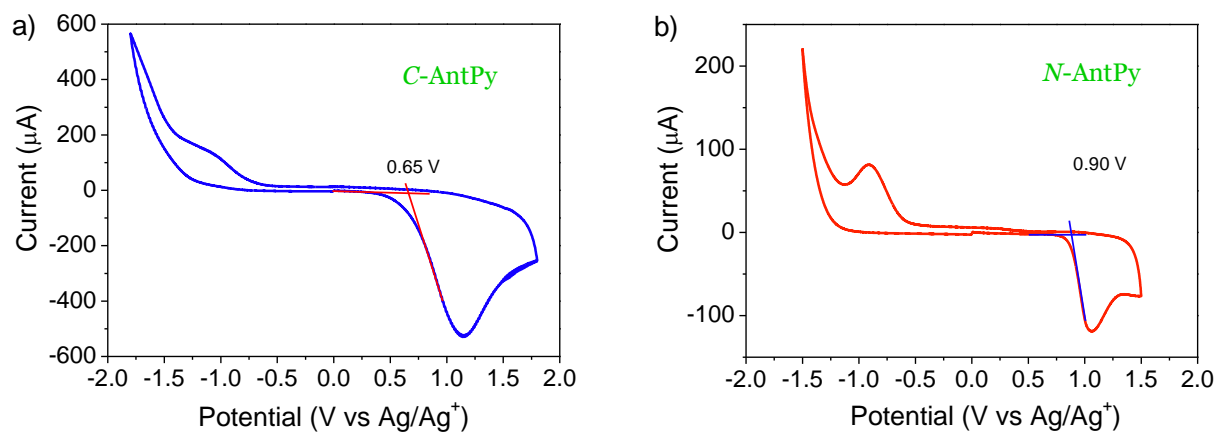

**Fig. S4** Cyclic Voltammetry of **C-AntPY** and **N-AntPY** in their film state using ferrocene as the internal standard.

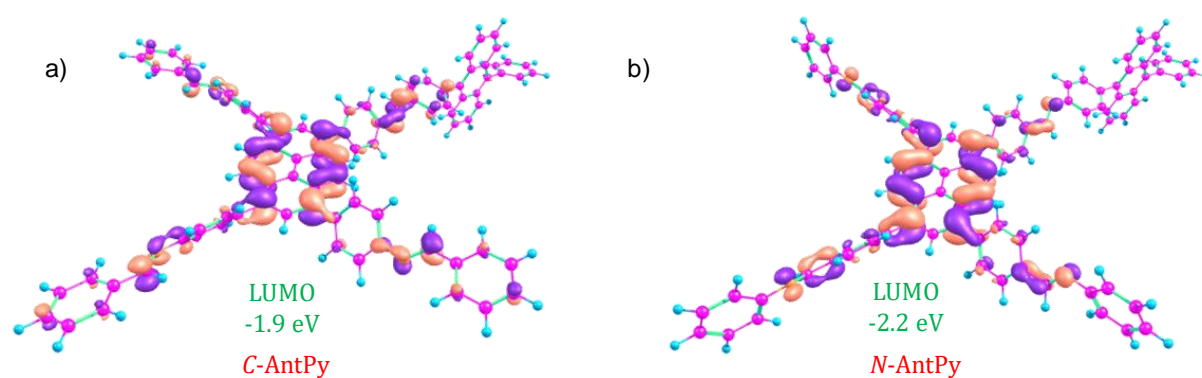

**Fig. S5** Frontier orbitals and energy levels of a) **C-AntPy** and b) **N-AntPy**.
